# Supplementary material for: Self-assembly of metal atoms (Na, K, Ca) on graphene
Source: Royal Society of Chemistry journal article supplement (doi:10.1039/c4nr05990e), 2014-12-19
Supplement: c4nr05990e1.pdf [file c4nr05990e1.pdf]

## Supplementary Information

### Self-assembly of metal atoms (Na, K, Ca) on graphene

Jian Zhou, Shunhong Zhang, Qian Wang, Yoshiyuki Kawazoe, and Puru Jena

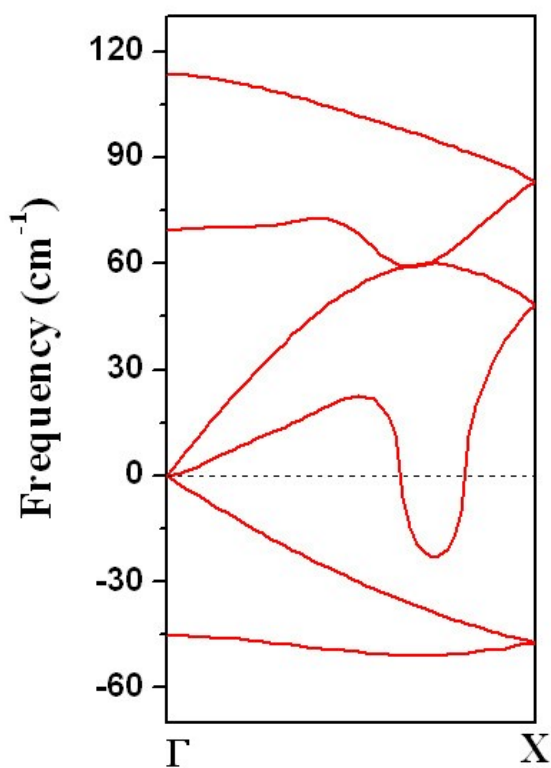

**Fig. S1** Phonon dispersion of a free standing Na chain.

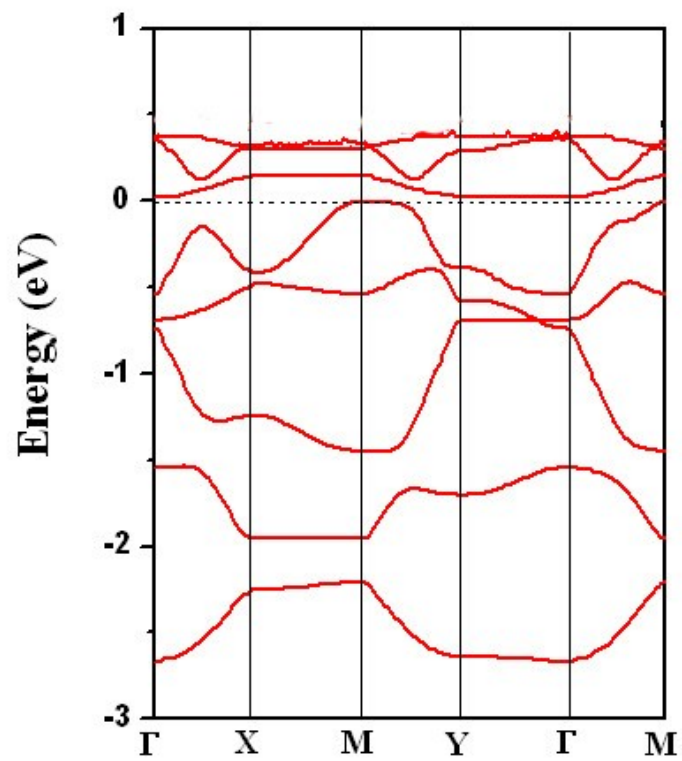

**Fig. S2** Band structure of 'empty' Ca chain (see main text).

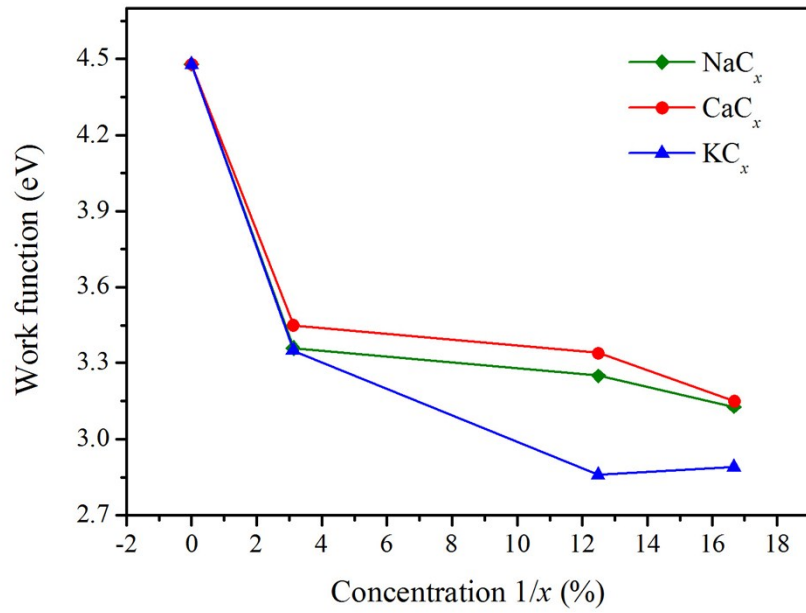

**Fig. S3** Work function variation of MC<sub>x</sub> with respect to the concentration 1/x.
